# Supplementary material
Source: PubMed Central journal article supplement (PMC2077052)

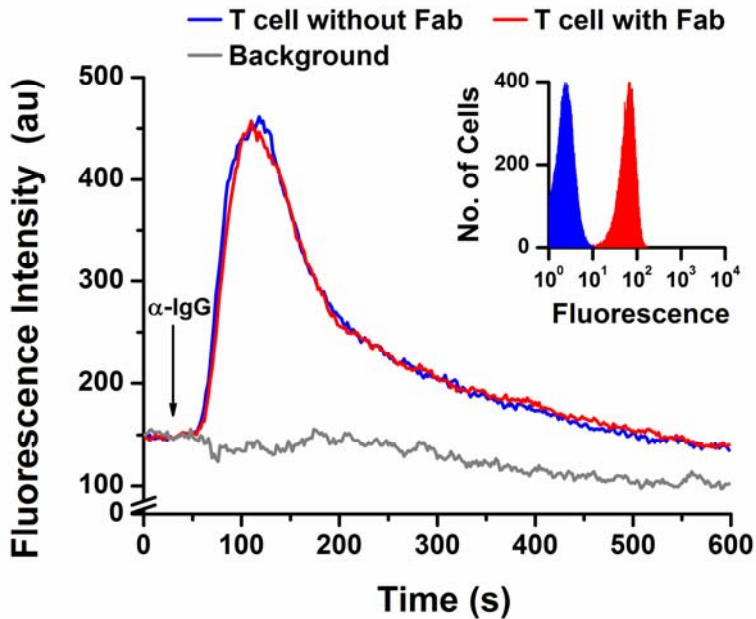

Supplement: pnas_0700411104_1.pdf [file pnas_0700411104_1.pdf]

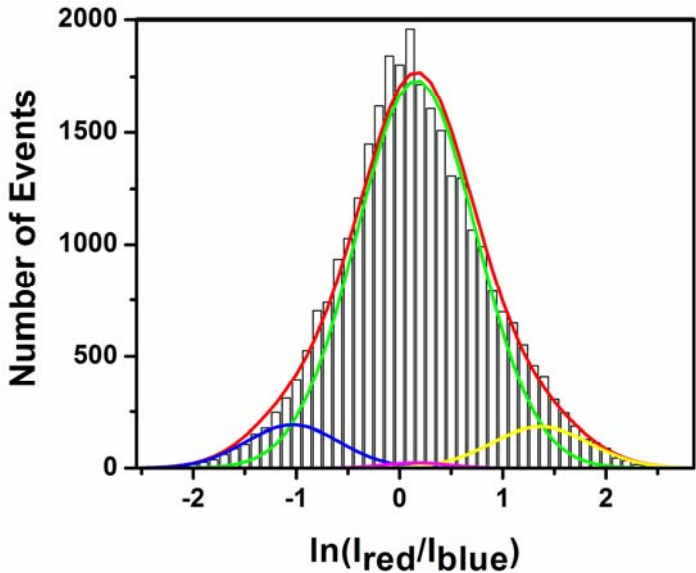

Supplement: pnas_0700411104_2.pdf [file pnas_0700411104_2.pdf]

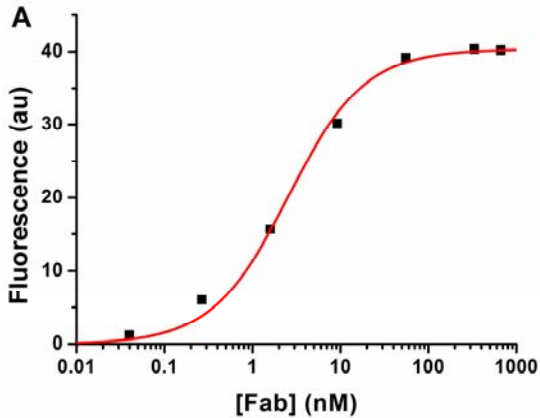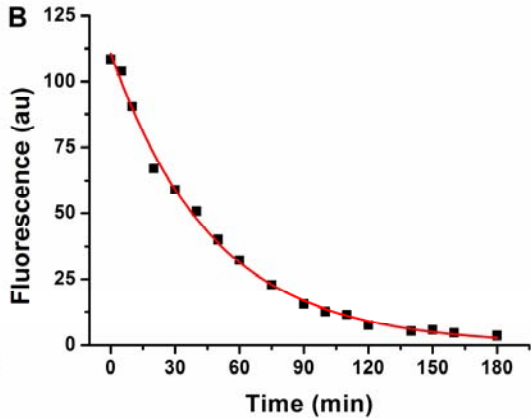

Supplement: pnas_0700411104_3.pdf [file pnas_0700411104_3.pdf]

---

TCR: 26,000

CD86: 2,300 – 13,500

CD28: 1,200 – 7,500

---

**A**

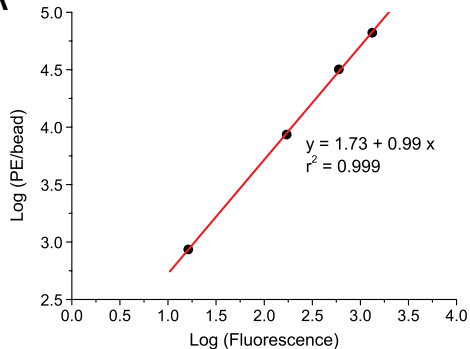

**B**

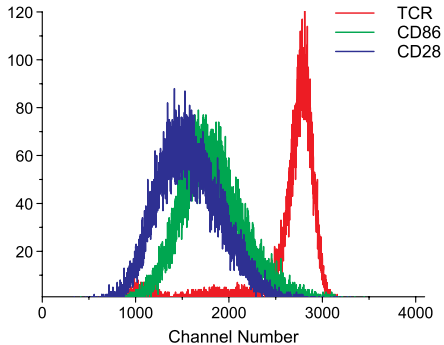

Supplement: pnas_0700411104_4.pdf [file pnas_0700411104_4.pdf]

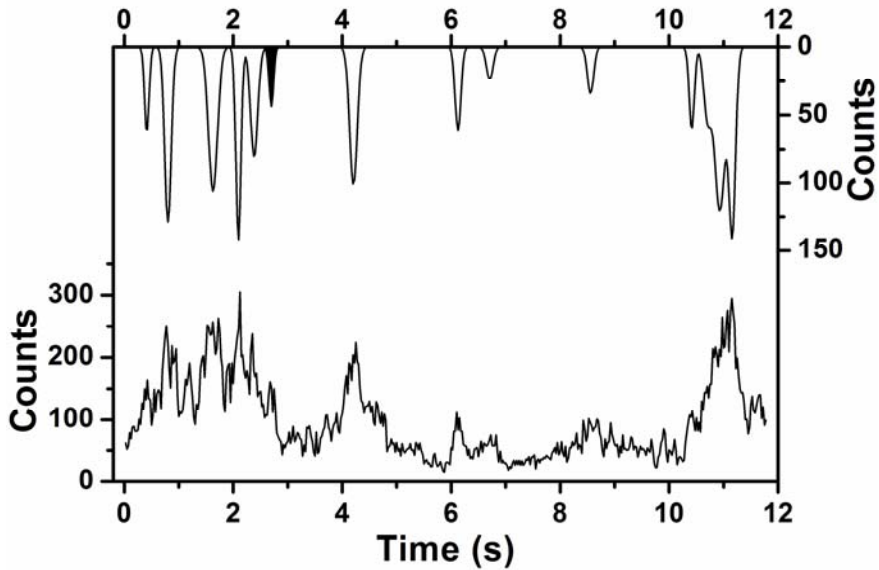

Supplement: pnas_0700411104_5.pdf [file pnas_0700411104_5.pdf]

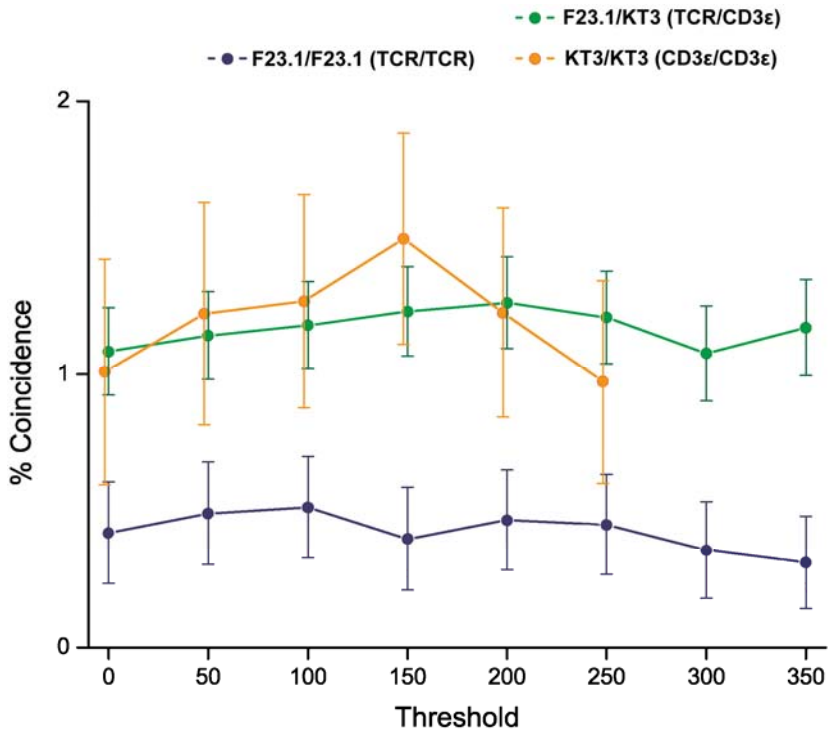

Supplement: pnas_0700411104_6.pdf [file pnas_0700411104_6.pdf]
